# Supplementary material for: The draft genome of the specialist flea beetle Altica viridicyanea (Coleoptera: Chrysomelidae)
Source: PubMed Central journal article supplement (PMC8028732; doi:10.1186/s12864-021-07558-6), 2021-04-07

Figure S1

*De novo*

Homolog

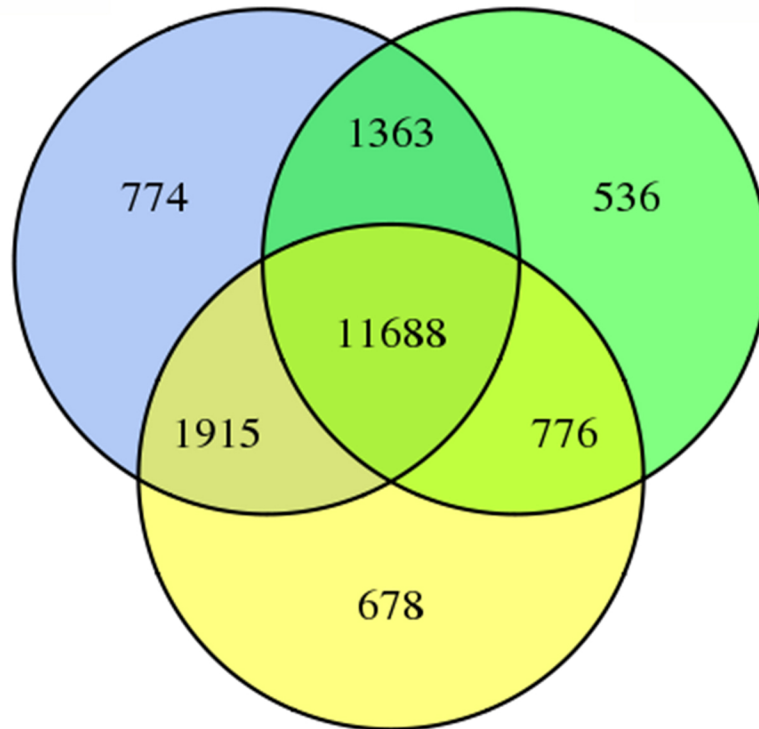

RNAseq







Figure S4

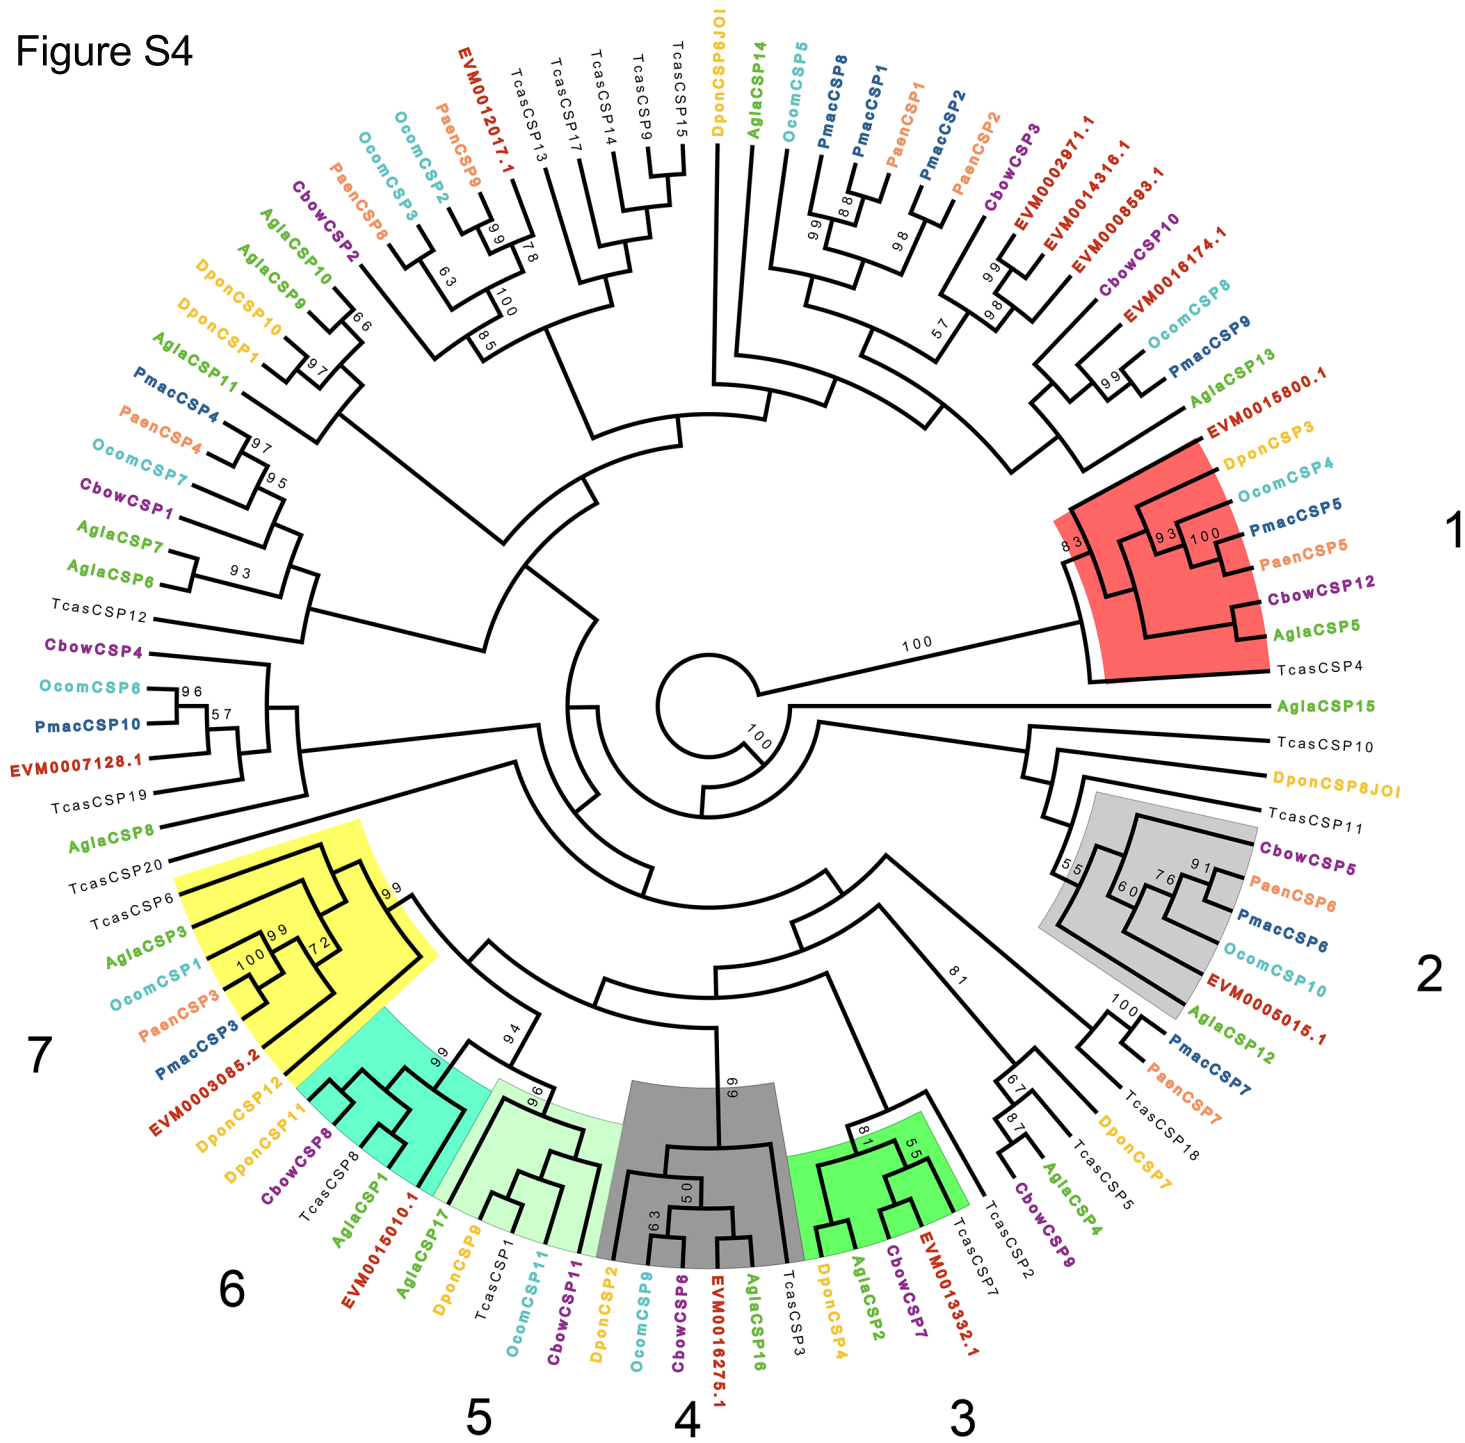

Figure S5

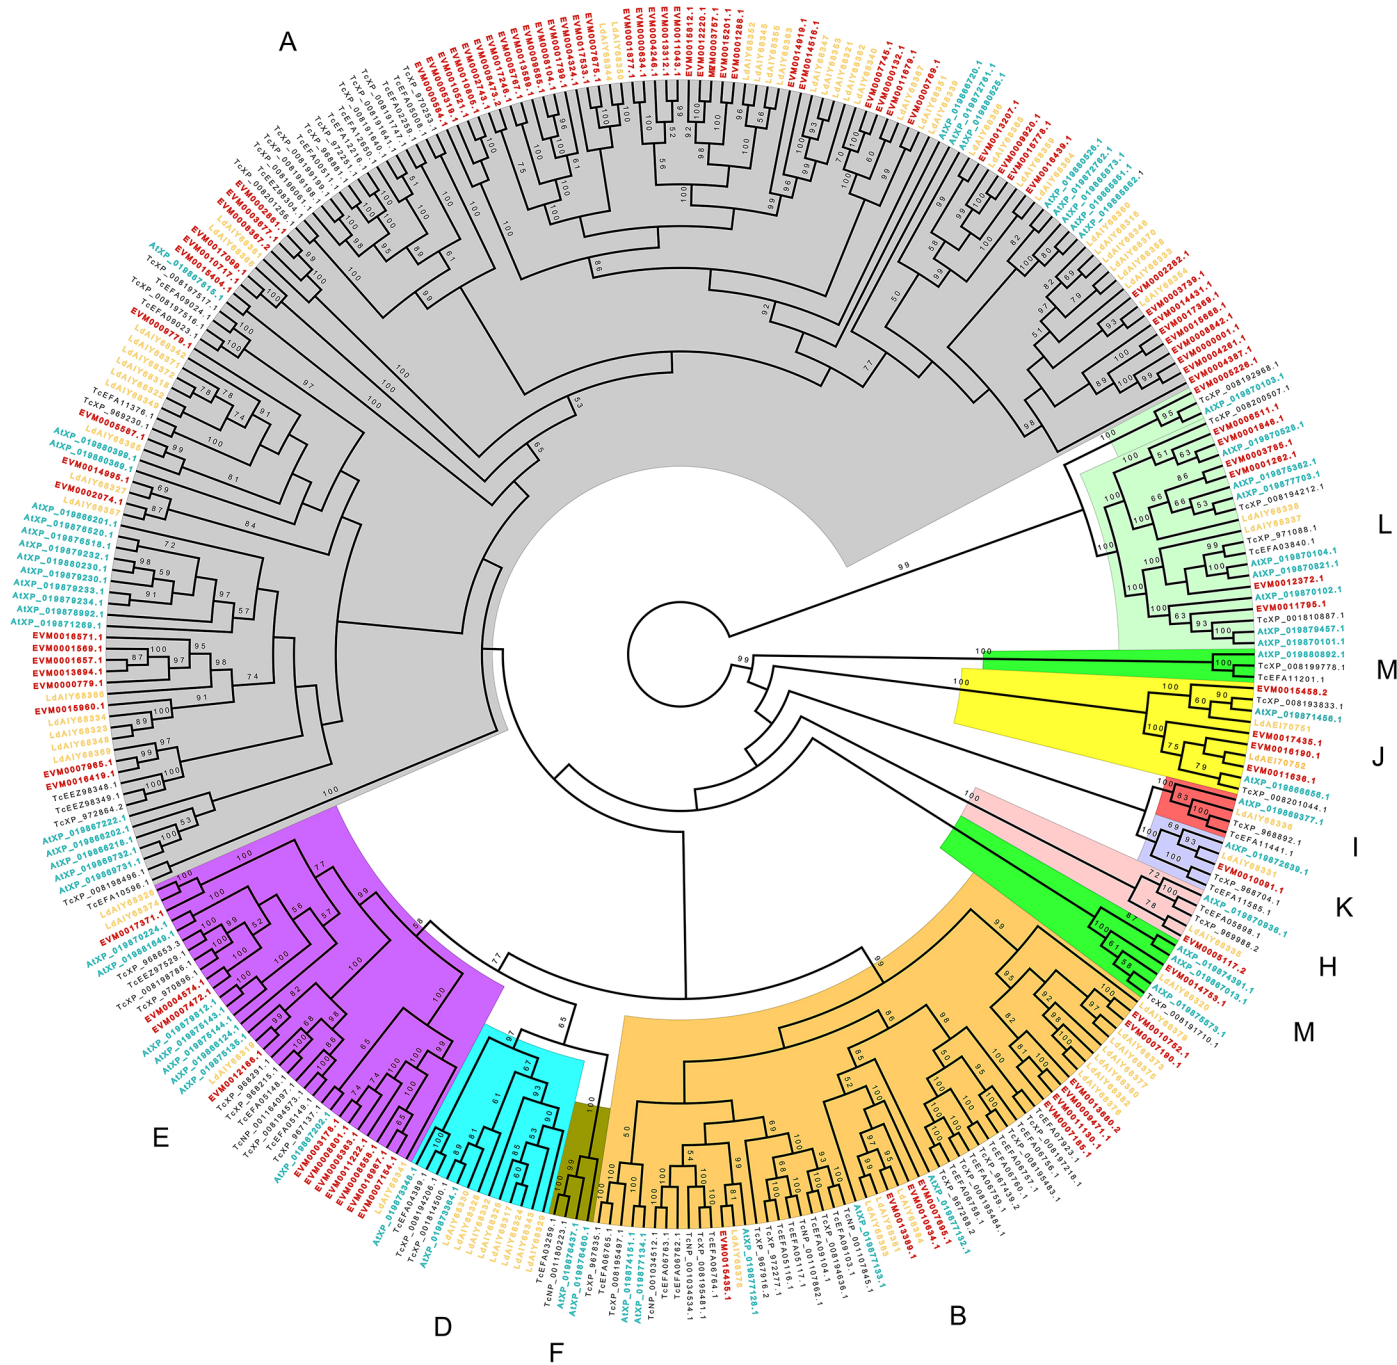



Figure S6

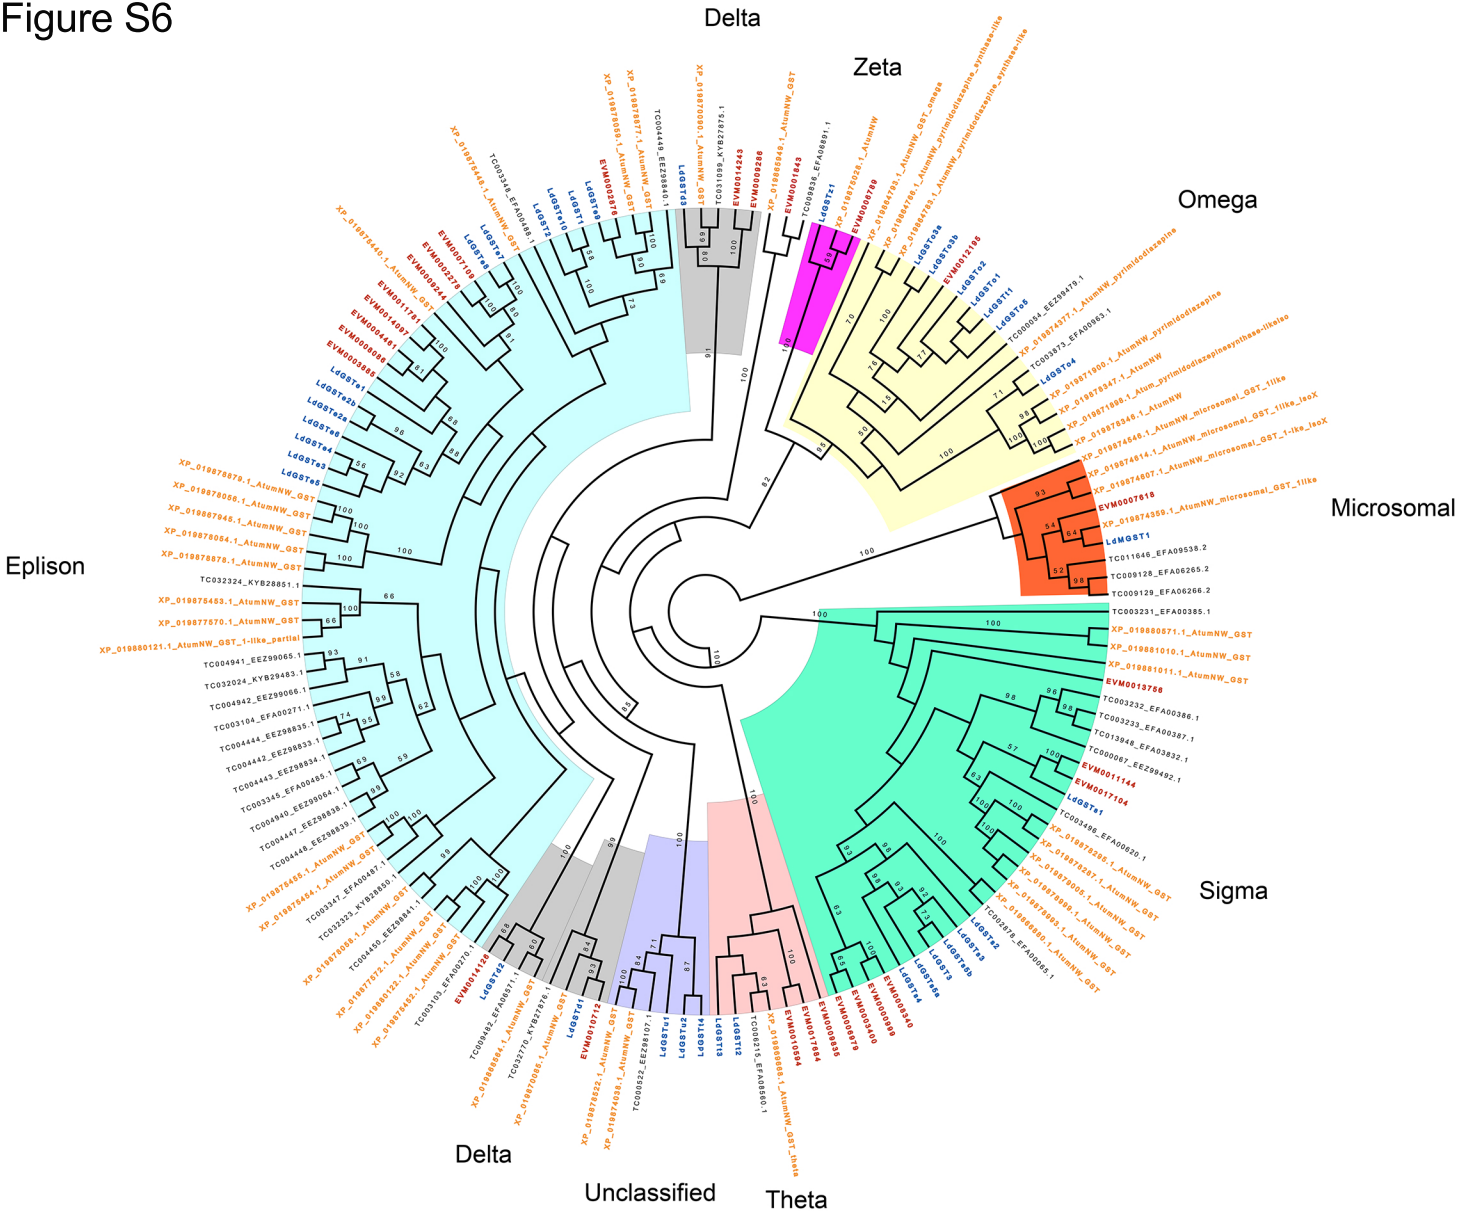

Supplement: 12864_2021_7558_MOESM1_ESM.pdf [file 12864_2021_7558_MOESM1_ESM.pdf]
